# Supplementary material
Source: PubMed Central journal article supplement (PMC8272725)
Supplement: NIHMS1661634-supplement-1.pdf [file NIHMS1661634-supplement-1.pdf]

## Epitranscriptome sequencing technologies: decoding RNA modifications



**Author:** Xiaoyu Li et al  
**Publication:** Nature Methods  
**Publisher:** Springer Nature  
**Date:** Dec 29, 2016

*Copyright © 2016, Nature Publishing Group, a division of Macmillan Publishers Limited. All Rights Reserved.*

### Order Completed

Thank you for your order.

This Agreement between Steve Knutson ("You") and Springer Nature ("Springer Nature") consists of your license details and the terms and conditions provided by Springer Nature and Copyright Clearance Center.

Your confirmation email will contain your order number for future reference.

**License Number** 4951580877199

[Printable Details](#)

**License date** Nov 17, 2020

#### Licensed Content

**Licensed Content Publisher** Springer Nature  
**Licensed Content Publication** Nature Methods  
**Licensed Content Title** Epitranscriptome sequencing technologies: decoding RNA modifications  
**Licensed Content Author** Xiaoyu Li et al  
**Licensed Content Date** Dec 29, 2016

#### Order Details

**Type of Use** Journal/Magazine  
**Requestor type** academic/university or research institute  
**Is this reuse sponsored by or associated with a pharmaceutical or a medical products company?** no  
**Format** print and electronic  
**Portion** figures/tables/illustrations  
**Number of figures/tables/illustrations** 1  
**High-res required** no  
**Will you be translating?** no  
**Circulation/distribution** 1000 - 1999  
**Author of this Springer Nature content** no

#### About Your Work

**Title of new article** Protein-based molecular recognition tools for detecting and profiling RNA modifications  
**Lead author** Steve Knutson  
**Title of targeted journal** Current Opinion in Structural Biology  
**Publisher** Elsevier  
**Expected publication date** Jan 2021

#### Additional Data

**Portions** Figure 1 will be modified and adapted to describe and illustrate the types of RNA modifications known.

 Requestor Location

Steve Knutson  
1515 Dickey Drive

Requestor Location

ATLANTA, GA 30322  
United States  
Attn: Emory University

 Billing Information

Billing Type

Invoice  
Emory University  
1515 Dickey Drive

Billing address

ATLANTA, GA 30322  
United States  
Attn: Emory University

 Tax Details

\$ Price

Total 105.00 USD

**Total: 105.00 USD**

CLOSE WINDOW

ORDER MORE
