# Supplementary material
Source: PubMed Central journal article supplement (PMC8272725)
Supplement: NIHMS1661634-supplement-2.pdf [file NIHMS1661634-supplement-2.pdf]

### Selective Enrichment of A-to-I Edited Transcripts from Cellular RNA Using Endonuclease V

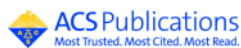

**Author:** Steve D. Knutson, Robert A. Arthur, H. Richard Johnston, et al

**Publication:** Journal of the American Chemical Society

**Publisher:** American Chemical Society

**Date:** Mar 1, 2020

*Copyright © 2020, American Chemical Society*

#### PERMISSION/LICENSE IS GRANTED FOR YOUR ORDER AT NO CHARGE

This type of permission/license, instead of the standard Terms & Conditions, is sent to you because no fee is being charged for your order. Please note the following:

- Permission is granted for your request in both print and electronic formats, and translations.
- If figures and/or tables were requested, they may be adapted or used in part.
- Please print this page for your records and send a copy of it to your publisher/graduate school.
- Appropriate credit for the requested material should be given as follows: "Reprinted (adapted) with permission from (COMPLETE REFERENCE CITATION). Copyright (YEAR) American Chemical Society." Insert appropriate information in place of the capitalized words.
- One-time permission is granted only for the use specified in your request. No additional uses are granted (such as derivative works or other editions). For any other uses, please submit a new request.

If credit is given to another source for the material you requested, permission must be obtained from that source.

[BACK](#)

[CLOSE WINDOW](#)
